# Supplementary material for: Assessment and Management of Cardiovascular Risk Factors Among US Veterans With Prostate Cancer
Source: PubMed Central journal article supplement (PMC7905496; doi:10.1001/jamanetworkopen.2021.0070), 2021-02-24
Supplement: jamanetwopen-e210070-s001.pdf [file jamanetwopen-e210070-s001.pdf]

## Supplementary Online Content

Sun L, Parikh RB, Hubbard RA, et al. Assessment and management of cardiovascular risk factors among US veterans with prostate cancer. *JAMA Netw Open*. 2021;4(2):e210070. doi:10.1001/jamanetworkopen.2021.0070

**eTable 1.** Coding Definitions

**eTable 2.** Demographic Parameters, Excluded Patients

**eFigure.** Rates of Comprehensive CVRF Assessment

**eTable 3.** Unadjusted Proportions and Risk Differences Associated With ASCVD/ADT Status

**eTable 4.** Sensitivity Analysis: Adjusted Proportions and Risk Differences in Patients With Localized Disease Only

This supplementary material has been provided by the authors to give readers additional information about their work.

eTable 1. Coding Definitions

| System and Codes                     |                                                                                                                      |                                                                                                             |                                                                                                                                                                               |                                                                                                            |                                                                                                       |
|--------------------------------------|----------------------------------------------------------------------------------------------------------------------|-------------------------------------------------------------------------------------------------------------|-------------------------------------------------------------------------------------------------------------------------------------------------------------------------------|------------------------------------------------------------------------------------------------------------|-------------------------------------------------------------------------------------------------------|
|                                      | ICD-9                                                                                                                | ICD-10                                                                                                      | HCPCS (Healthcare Common Procedure Coding System)                                                                                                                             |                                                                                                            |                                                                                                       |
| <b>Androgen Deprivation Therapy</b>  | V07.59                                                                                                               | Z79.818                                                                                                     | Leuprolide (C9430, J1950, J9217-219)<br>Goserelin (J9202)<br>Abarelix (C9216, J0128, S0165)<br>Triptorelin (J3315)<br>Other (S0175, G9132, J9165, S9560, G0356, J1050, J1051) |                                                                                                            |                                                                                                       |
| <b>ASCVD</b>                         | <b>ICD-9</b>                                                                                                         | <b>ICD-10</b>                                                                                               |                                                                                                                                                                               |                                                                                                            |                                                                                                       |
| Coronary artery disease              | 410-414, 429,79, 996.03                                                                                              | I20-25, T82.21, T82.85                                                                                      |                                                                                                                                                                               |                                                                                                            |                                                                                                       |
| Stroke                               | 433-438                                                                                                              | G45-46, I63, I65, I66, I67, I69                                                                             |                                                                                                                                                                               |                                                                                                            |                                                                                                       |
| PVD or other atherosclerotic disease | 93, 437, 440, 441, 443, 444, 445, 447, 556, V43.4                                                                    | I70, I71, I73-I75, I77, I79, K55, Z95                                                                       |                                                                                                                                                                               |                                                                                                            |                                                                                                       |
| <b>Laboratory Values</b>             | <b>LOINC (Logical Observation Identifiers Names and Codes)</b>                                                       |                                                                                                             |                                                                                                                                                                               |                                                                                                            |                                                                                                       |
| LDL                                  | 12773-8<br>13457-7<br>18261-8<br>18262-6<br>2089-1<br>2090-9<br>43392-0<br>43393-8                                   | 43396-1<br>46984-1<br>46985-8<br>49026-8<br>49027-6<br>49132-4<br>55440-2<br>57938-3                        | 91105-7<br>91106-5<br>91107-3<br>91108-1<br>91109-9<br>91110-7<br>91111-5<br>35198-1                                                                                          | 22748-8<br>39469-2<br>56136-5<br>56137-3<br>56138-1<br>56139-9<br>69419-0<br>70204-3                       | 91112-3<br>91113-1<br>91114-9<br>91115-6<br>91116-4<br>91117-2<br>91118-0                             |
| Total cholesterol                    | 12183-0<br>12531-0<br>12912-2<br>2093-3                                                                              | 2565-0<br>2569-2<br>48620-9                                                                                 | 50339-1<br>56912-9<br>59038-0                                                                                                                                                 | 9618-0<br>35200-5<br>14647-2                                                                               | 29765-5<br>32308-9<br>39468-4                                                                         |
| HbA1c                                | 41995-2<br>71875-9                                                                                                   | 17855-8<br>17856-6                                                                                          | 4548-4                                                                                                                                                                        | 4549-2                                                                                                     | 62388-4                                                                                               |
| Glucose: fasting or tolerance test   | 10449-7<br>10832-4<br>12610-2<br>12615-1<br>12616-9<br>12617-7<br>12646-6<br>12648-2<br>13606-9<br>14761-1<br>1494-4 | 1496-9<br>14995-5<br>1501-6<br>1504-0<br>1506-5<br>1507-3<br>1514-9<br>1517-2<br>1518-0<br>1521-4<br>1525-5 | 1526-3<br>1527-1<br>1530-5<br>1533-9<br>1537-0<br>1539-6<br>1540-4<br>1542-0<br>1544-6<br>16914-4<br>16915-1                                                                  | 18342-6<br>20436-2<br>20437-0<br>20438-8<br>20439-6<br>20440-4<br>26541-3<br>26543-9<br>26777-3<br>26778-1 | 26779-9<br>26780-7<br>29330-8<br>32820-3<br>6689-4<br>6762-9<br>10450-5<br>1554-5<br>1556-0<br>1558-6 |

| <b>Medications</b> | <b>Medication Class Code (VA National Drug File)</b>                                                                                                                         |
|--------------------|------------------------------------------------------------------------------------------------------------------------------------------------------------------------------|
| BP-lowering        | CV100 (beta blockers), CV200 (calcium channel blockers), CV400 (antihypertensive combinations), CV700 (diuretics), CV800 (ACE inhibitors), CV805 (angiotensin II inhibitors) |
| Lipid-lowering     | CV350                                                                                                                                                                        |
| Glucose-lowering   | HS500-502, HS509                                                                                                                                                             |

ASCVD, atherosclerotic cardiovascular disease; PVD, peripheral vascular disease; LDL: low-density lipoprotein

eTable 2. Demographic Parameters, Excluded patients

| Characteristic                                       | Excluded: ADT Status Unconfirmed (n=7,257) <sup>a</sup> | Excluded: No PCP Visit (n=2,197) | % Missing, All Excluded (n=9,454) | % Missing, All Included (n=90,494) |
|------------------------------------------------------|---------------------------------------------------------|----------------------------------|-----------------------------------|------------------------------------|
| Age, median (IQR)                                    | 68 (63, 75)                                             | 66 (61, 72)                      | 1.7%                              | 0%                                 |
| Race                                                 |                                                         |                                  | 7.9%                              | 4.5%                               |
| White                                                | 4676 (68.7%)                                            | 1223 (64.5%)                     |                                   |                                    |
| African American                                     | 1967 (28.9%)                                            | 626 (33.0%)                      |                                   |                                    |
| Other                                                | 167 (2.5%)                                              | 48 (2.5%)                        |                                   |                                    |
| Year Category                                        |                                                         |                                  |                                   |                                    |
| 2010-2011                                            | 1872 (25.8%)                                            | 890 (40.5%)                      |                                   |                                    |
| 2012-2013                                            | 1912 (26.3%)                                            | 569 (25.9%)                      |                                   |                                    |
| 2014-2015                                            | 1796 (24.7%)                                            | 429 (19.5%)                      |                                   |                                    |
| 2016-2017                                            | 1677 (23.1%)                                            | 309 (14.1%)                      |                                   |                                    |
| Number of PCP visits over study period, median (IQR) | 5 (3, 8)                                                | . (. , .)                        |                                   |                                    |
| Poverty index above median                           | 4466 (62.2%)                                            | 1123 (55.7%)                     | 2.7%                              | 0.7%                               |
| Prior ASCVD                                          | 1454 (20.0%)                                            | 140 (6.4%)                       |                                   |                                    |
| Smoking Status                                       |                                                         |                                  | 31.4%                             | 22.3%                              |
| Never                                                | 1899 (33.8%)                                            | 282 (32.9%)                      |                                   |                                    |
| Current                                              | 1834 (32.6%)                                            | 336 (39.2%)                      |                                   |                                    |
| Former                                               | 1892 (33.6%)                                            | 240 (28.0%)                      |                                   |                                    |
| BMI, median (IQR), kg/m <sup>2</sup>                 | 28.1 (24.8, 32.1)                                       | 27.4 (23.7, 31.1)                | 23.5%                             | 10.8%                              |
| Overweight (BMI≥25 kg/m <sup>2</sup> )               | 4589 (73.8%)                                            | 668 (65.9%)                      |                                   |                                    |
| Obese (BMI>30 kg/m <sup>2</sup> )                    | 2273 (36.5%)                                            | 327 (32.2%)                      |                                   |                                    |
| Disease Stage                                        |                                                         |                                  | 3.3%                              | 3.3%                               |
| Low risk                                             | 372 (5.2%)                                              | 488 (24.8%)                      |                                   |                                    |
| Intermediate risk                                    | 2037 (28.4%)                                            | 511 (26.0%)                      |                                   |                                    |
| High risk                                            | 2840 (39.6%)                                            | 623 (31.7%)                      |                                   |                                    |
| Metastatic or N1                                     | 1924 (26.8%)                                            | 345 (17.5%)                      |                                   |                                    |
| PSA                                                  |                                                         |                                  | 8.6%                              | 5.8%                               |
| <10 ng/mL                                            | 3269 (47.2%)                                            | 1040 (60.6%)                     |                                   |                                    |
| 10-20 ng/mL                                          | 1483 (21.4%)                                            | 281 (16.4%)                      |                                   |                                    |
| ≥20 ng/mL                                            | 2174 (31.4%)                                            | 396 (23.1%)                      |                                   |                                    |
| Gleason Score                                        |                                                         |                                  | 12.4%                             | 9.5%                               |
| ≤6                                                   | 609 (9.3%)                                              | 563 (32.3%)                      |                                   |                                    |
| 7                                                    | 2783 (42.5%)                                            | 685 (39.3%)                      |                                   |                                    |
| 8-10                                                 | 3149 (48.1%)                                            | 493 (28.3%)                      |                                   |                                    |
| T Stage                                              |                                                         |                                  | 18.5%                             | 12.4%                              |
| T1-T2a                                               | 4006 (65.3%)                                            | 1103 (70.3%)                     |                                   |                                    |
| T2b                                                  | 321 (5.2%)                                              | 43 (2.7%)                        |                                   |                                    |
| T2c or higher                                        | 1812 (29.5%)                                            | 424 (27.0%)                      |                                   |                                    |

<sup>a</sup>Unless otherwise indicated, data are expressed as number (percentage) of patients with recorded data.

ADT, androgen deprivation therapy; IQR, interquartile range; y, years; PCP, primary care provider; ASCVD, atherosclerotic cardiovascular disease; BMI, body mass index (calculated as weight in kilograms divided by square of height in meters); PSA, prostate specific antigen; T stage, tumor stage.

eFigure. Rates of Comprehensive CVRF Assessment

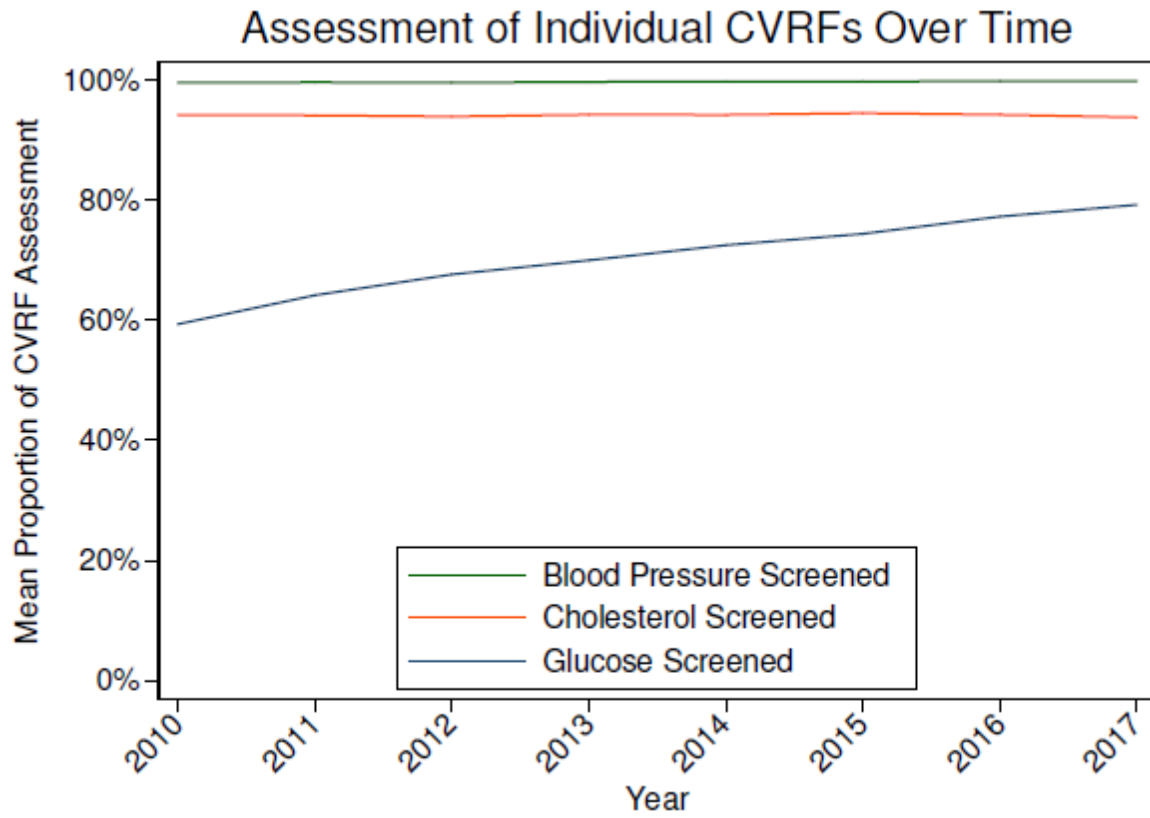

eTable 3. Unadjusted proportions and risk differences associated with ASCVD/ADT status

| <b>Comprehensive CVRF Assessment</b>       |                                                                                               |                                                  |                      |                     |
|--------------------------------------------|-----------------------------------------------------------------------------------------------|--------------------------------------------------|----------------------|---------------------|
|                                            | Proportion with Comprehensive Assessment (95% CI), Reference group (ASCVD-/ADT-) <sup>a</sup> | Unadjusted Risk Difference (95% CI) <sup>d</sup> |                      |                     |
|                                            |                                                                                               | ASCVD+/ADT-                                      | ASCVD+/ADT+          | ASCVD-/ADT+         |
| <b>Comprehensive Assessment (n=90,494)</b> | 66.3%<br>(65.9%,66.7%)                                                                        | 9.7%<br>(8.8%,10.6%)                             | 9.0%<br>(7.7%,10.2%) | 0.8%<br>(0.0%,1.5%) |

  

| <b>Uncontrolled CVRF</b>          |                                                                              |                                                  |                           |                        |
|-----------------------------------|------------------------------------------------------------------------------|--------------------------------------------------|---------------------------|------------------------|
| CVRF (Number with recorded value) | Proportion Uncontrolled (95% CI), Reference group (ASCVD-/ADT-) <sup>b</sup> | Unadjusted Risk Difference (95% CI) <sup>d</sup> |                           |                        |
|                                   |                                                                              | ASCVD+/ADT-                                      | ASCVD+/ADT+               | ASCVD-/ADT+            |
| Blood pressure (n=89,572)         | 35.6%<br>(35.2%,36.0%)                                                       | -4.4%<br>(-5.4%,-3.4%)                           | -3.5%<br>(-4.9%,-2.1%)    | 3.8%<br>(3.9%,4.6%)    |
| Cholesterol (n=85,243)            | 22.2%<br>(21.9%,22.6%)                                                       | -10.3%<br>(-11.1%,-9.6%)                         | -11.7%<br>(-12.6%,-10.7%) | -2.8%<br>(-3.5%,-2.1%) |
| Glucose (n=63,292)                | 16.8%<br>(16.4%,17.1%)                                                       | 8.5%<br>(7.5%,9.5%)                              | 10.9%<br>(9.4%,12.4%)     | 3.2%<br>(2.4%,4.0%)    |
| Any CVRF (n=90,060)               | 54.3%<br>(53.9%,54.7%)                                                       | -4.7%<br>(-5.8%,-3.7%)                           | -3.1%<br>(-4.6%,-1.6%)    | 2.3%<br>(1.4%,3.1%)    |

  

| <b>Untreated CVRF</b>      |                                                                           |                                                  |                           |                        |
|----------------------------|---------------------------------------------------------------------------|--------------------------------------------------|---------------------------|------------------------|
| CVRF (Number uncontrolled) | Proportion Untreated (95% CI), Reference group (ASCVD-/ADT-) <sup>c</sup> | Unadjusted Risk Difference (95% CI) <sup>d</sup> |                           |                        |
|                            |                                                                           | ASCVD+/ADT-                                      | ASCVD+/ADT+               | ASCVD-/ADT+            |
| Blood pressure (n=31,960)  | 24.7%<br>(24.1%,25.3%)                                                    | -16.0%<br>(-17.1%,-14.8%)                        | -17.1%<br>(-18.6%,-15.7%) | -4.1%<br>(-5.2%,-3.0%) |
| Cholesterol (n=16,879)     | 50.5%<br>(49.6%,51.4%)                                                    | -32.1%<br>(-34.5,-29.7%)                         | -25.2%<br>(-29.2%,-21.2%) | 0.4%<br>(-1.6%,2.3%)   |
| Glucose (n=12,098)         | 8.9%<br>(8.2%,9.6%)                                                       | -2.8%<br>(-4.1%,-1.6%)                           | -1.0%<br>(-2.8%,0.8%)     | -1.3%<br>(-2.5%,0.0%)  |
| Any CVRF (n=48,683)        | 34.1%<br>(33.6%,34.6%)                                                    | -22.7%<br>(-23.8,-21.7%)                         | -21.8%<br>(-23.2%,-20.4%) | -4.6%<br>(-5.6%,-3.5%) |

<sup>a</sup> Unadjusted proportion of patients in the reference group (No ASCVD, No ADT) with comprehensive CVRF assessment

<sup>b</sup> Unadjusted proportion of patients in the reference group (No ASCVD, No ADT) with recorded measurements who have uncontrolled CVRFs

<sup>c</sup> Unadjusted proportion of patients in the reference group (No ASCVD, No ADT) with uncontrolled CVRFs who are not on a corresponding risk-reducing medication

<sup>d</sup> Risk difference coefficients are interpreted as absolute percent change in the risk of outcome.

CVRF, cardiovascular risk factor; CI, confidence interval; ADT, androgen deprivation therapy; ASCVD, atherosclerotic cardiovascular disease.



e Table 4. Sensitivity analysis: Adjusted proportions and risk differences in patients with localized disease only

| <b>Comprehensive CVRF Assessment</b>       |                                                                                                        |                                                |                        |                     |
|--------------------------------------------|--------------------------------------------------------------------------------------------------------|------------------------------------------------|------------------------|---------------------|
|                                            | Adjusted Proportion with Comprehensive Assessment (95% CI), Reference group (ASCVD-/ADT-) <sup>a</sup> | Adjusted Risk Difference (95% CI) <sup>d</sup> |                        |                     |
|                                            |                                                                                                        | ASCVD+/ADT-                                    | ASCVD+/ADT+            | ASCVD-/ADT+         |
| <b>Comprehensive Assessment (n=81,364)</b> | 66.4%<br>(66.0%,66.8%)                                                                                 | 10.3%<br>(9.3%,11.2%)                          | 12.2%<br>(10.7%,13.7%) | 3.1%<br>(2.2%,4.1%) |

  

| <b>Uncontrolled CVRF</b>          |                                                                                       |                                                |                         |                        |
|-----------------------------------|---------------------------------------------------------------------------------------|------------------------------------------------|-------------------------|------------------------|
| CVRF (Number with recorded value) | Adjusted Proportion Uncontrolled (95% CI), Reference group (ASCVD-/ADT-) <sup>b</sup> | Adjusted Risk Difference (95% CI) <sup>d</sup> |                         |                        |
|                                   |                                                                                       | ASCVD+/ADT-                                    | ASCVD+/ADT+             | ASCVD-/ADT+            |
| Blood pressure (n=80,675)         | 35.9%<br>(35.4%,36.3%)                                                                | -4.6%<br>(-5.6%,-3.6%)                         | -4.2%<br>(-5.9%,-2.5%)  | 2.8%<br>(1.8%,3.8%)    |
| Cholesterol (n=77,155)            | 21.8%<br>(21.4%,22.2%)                                                                | -9.0%<br>(-9.7%,-8.2%)                         | -9.4%<br>(-10.6%,-8.3%) | -1.7%<br>(-2.5%,-0.8%) |
| Glucose (n=57,211)                | 16.9%<br>(16.5%,17.3%)                                                                | 8.2%<br>(7.1%,9.3%)                            | 10.8%<br>(9.0%,12.6%)   | 3.4%<br>(2.5%,4.4%)    |
| Any CVRF (n=81,044)               | 54.3%<br>(53.9%,54.8%)                                                                | -4.1%<br>(-5.2%,-3.0%)                         | -2.3%<br>(-4.1%,-0.5%)  | 2.8%<br>(1.8%,3.8%)    |

  

| <b>Untreated CVRF</b>      |                                                                                    |                                                |                           |                        |
|----------------------------|------------------------------------------------------------------------------------|------------------------------------------------|---------------------------|------------------------|
| CVRF (Number uncontrolled) | Adjusted Proportion Untreated (95% CI), Reference group (ASCVD-/ADT-) <sup>c</sup> | Adjusted Risk Difference (95% CI) <sup>d</sup> |                           |                        |
|                            |                                                                                    | ASCVD+/ADT-                                    | ASCVD+/ADT+               | ASCVD-/ADT+            |
| Blood pressure (n=28,723)  | 24.3%<br>(23.6%,24.9%)                                                             | -16.0%<br>(-17.2%,-14.8%)                      | -17.2%<br>(-19.0%,-15.4%) | -4.4%<br>(-5.8%,-3.1%) |
| Cholesterol (n=15,407)     | 50.2%<br>(49.3%,51.2%)                                                             | -32.4%<br>(-34.9,-30.0%)                       | -30.2%<br>(-34.7%,-25.8%) | -2.9%<br>(-5.2%,-0.5%) |
| Glucose (n=10,928)         | 8.9%<br>(8.2%,9.7%)                                                                | -3.0%<br>(-4.3%,-1.6%)                         | -3.6%<br>(-5.5%,-1.6%)    | -2.6%<br>(-4.0%,-1.2%) |
| Any CVRF (n=43,925)        | 33.7%<br>(33.1%,34.2%)                                                             | -22.3%<br>(-23.4,-21.3%)                       | -23.1%<br>(-24.7%,-21.4%) | -5.7%<br>(-6.9%,-4.5%) |

<sup>a</sup> Adjusted proportion of patients in the reference group (No ASCVD, No ADT) with comprehensive CVRF assessment

<sup>b</sup> Adjusted proportion of patients in the reference group (No ASCVD, No ADT) with recorded measurements who have uncontrolled CVRFs

<sup>c</sup> Adjusted proportion of patients in the reference group (No ASCVD, No ADT) with uncontrolled CVRFs who are not on a corresponding risk-reducing medication

<sup>d</sup> Adjusted for race, age, poverty index, disease stage, and year. Risk difference coefficients are interpreted as absolute percent change in the risk of outcome.

CVRF, cardiovascular risk factor; CI, confidence interval; ADT, androgen deprivation therapy; ASCVD, atherosclerotic cardiovascular disease.
